# Supplementary material for: Unlocking the Potential of Acetazolamide: A Literature Review of an Adjunctive Approach in Heart Failure Management
Source: MDPI journal article supplement (doi:10.3390/jcm13010288), 2024-01-04
Supplement: s1 [file s1]

| Study                   | Sample Size | Intevention(s)                                                                                                                                                              | Primary Outcomes Measured                                                                            | Secondary Outcomes Measured                                                                                 | Primary Outcome Results                                                                                                                                                                                                           | Secondary Outcome Results                                                                                                                                                                                                                                                                                             |
|-------------------------|-------------|-----------------------------------------------------------------------------------------------------------------------------------------------------------------------------|------------------------------------------------------------------------------------------------------|-------------------------------------------------------------------------------------------------------------|-----------------------------------------------------------------------------------------------------------------------------------------------------------------------------------------------------------------------------------|-----------------------------------------------------------------------------------------------------------------------------------------------------------------------------------------------------------------------------------------------------------------------------------------------------------------------|
| Imiela (2017) [16]      | 20          | Oral Acetazolamide daily dose adjustments based on body weight (<75 kg, 250 mg; 75 - 100 kg, 375 mg; >100 kg, 500 mg)                                                       | Mean diuresis in ml days 3 & 4 and days 2, 3, and 4.                                                 | Dyspnea measured on days 1-4                                                                                | Day 3, 4 (ml): 2769.5 (P=0.41)<br>Day 2, 3, 4 (ml): 2603.6 (P=0.91)<br><br>Day 1-4 (mmol/L): 207.9, 212.9, 253.1, 258 (P= 0.4, 0.55, 0.81, 0.43)<br><br>Day 3, 4 (ml): -541 (P=0.025)<br>Day 2, 3, 4 (ml): -304 (P=0.18)          | <u>Visual Dyspnea Scale (mean ± SD)</u><br>Day 1: 26 (±27) P=0.12<br>Day 2: 18 (±18) P=0.14<br>Day 3: 16 (±21) P=0.038<br>Day 4: 9 (±9) P=0.0006<br><br><u>Likert Scale (mean ± SD):</u><br>Day 1: 2.278 (±1.1) P=0.13<br>Day 2: 1.722 (±0.7) P=0.0076<br>Day 3: 1.667 (±0.97) P=0.07<br>Day 4: 1.444 (±0.64) P=0.041 |
|                         |             | Furosemide                                                                                                                                                                  | Natriuresis in mmol/L on each day (1-4).<br><br>Fluid Balance in ml days 3 & 4 and days 2, 3, and 4. |                                                                                                             | Day 3, 4 (ml): 2434.50<br>Day 2, 3, 4 (ml): 2557.00<br><br>Day 1-4 (mmol/L): 260.88, 247.11, 240.7, 213.3<br><br>Day 3,4 (ml): 242, 95.3                                                                                          | <u>Visual Dyspnea Scale (mean ± SD)</u><br>Day 1: 42 (±13)<br>Day 2: 41 (±16)<br>Day 3: 38 (±19)<br>Day 4: 35 (±16)<br><br><u>Likert Scale (mean ± SD)</u><br>Day 1: 3 (±0.8)<br>Day 2: 2.833 (±0.8)<br>Day 3: 2.778 (±1.4)<br>Day 4: 2.222 (±0.83)                                                                   |
| Nunez (2018) [17]       | 25          | Acetazolamide + Loop Diuretic 120mg/day                                                                                                                                     | NYHA class<br>Weight<br>CA125<br>NT-proBNP                                                           | Estimated glomerular filtration rate (eGFR), urea, serum sodium, potassium, pH, and systolic blood pressure | Improvement in NYHA class (P=0.0018)<br>Reduction in weight (P = 0.023)<br>Decrease in CA125 (P=0.001)<br>NT-proBNP remained stable                                                                                               | GFR improved (P=0.002)<br>no significant changes for other outcomes                                                                                                                                                                                                                                                   |
| DIURESE-CHF (2019) [18] | 34          | Acetazolamide 250 mg daily + low-dose loop diuretics (bumetanide 1 mg twice daily)<br><br>Or<br><br>Acetazolamide 500 mg daily + high-dose loop diuretics (bumetanide 2 mg) | 24-hour natriuresis (corrected for loop diuretic dose)                                               | NT-proBNP levels<br>Worsening renal function (WRF)<br>Neurohormonal activation<br>Clinical outcomes         | 84±46 mmol (P=0.048)                                                                                                                                                                                                              | NT-proBNP: 8165 ng/L to 6341 ng/L (P = 0.001)<br><br>WRF: 5 (28%) (P=0.046)<br><br>Peak Plasma Renin Activity: 4.8 µg/L/h (P=0.904)<br>Peak Plasma Aldosterone Acvitiy: 260 ng/L (P = 0.756)<br><br>No statistical difference in clinical outcomes                                                                    |
|                         |             | High-dose loop diuretics alone (twice the home maintenance dose)                                                                                                            |                                                                                                      |                                                                                                             | 52±42 mmol                                                                                                                                                                                                                        | NT-proBNP: 7339 ng/L to 5746 ng/L<br><br>WRF: 0 (0%)<br><br>Peak Plasma Renin Activity: 4.9 µg/L/h<br>Peak Plasma Aldosterone Acvitiy: 212 ng/L<br><br>No statistical difference in clinical outcomes                                                                                                                 |
| ADVOR (2022) [19]       | 519         | Acetazolamide 500 mg IV once daily + Loop diuretic IV (2x oral maintenance dose)                                                                                            | Succesful Decongestion                                                                               | Duration of stay<br>OR<br>All cause death or Rehospitalization for heart failure                            | 42.2% (P<0.001)                                                                                                                                                                                                                   | 8.8 Days (CI; 0.81–0.98)<br>76 Particpants (29.7%) Hazard ratio, 1.07 (0.78–1.48)                                                                                                                                                                                                                                     |
|                         |             | Placebo + Loop diuretic IV (2x oral maintenance dose)                                                                                                                       |                                                                                                      |                                                                                                             | 30.50%                                                                                                                                                                                                                            | 9.9 Days<br>72 participants (27.8%)                                                                                                                                                                                                                                                                                   |
| CANDI (2022) [22]       | 55          | Acetazolamide 125-250 mg + furosemide 120-180 mg                                                                                                                            | Diuresis (ml)<br>Natriuresis (mEq/L)<br>Weight loss (kg)                                             |                                                                                                             | Diuresis: No significant difference (+2025 ml, 95% CI: -1551 to 5601; p = 0.260)<br>Natriuresis: No significant difference (+1311 mEq/l, 95% CI: -235 to 2859; p = 0.095)<br>Weight loss reduction of ≥1 kg: 62% (CI: 95%, 39-84) |                                                                                                                                                                                                                                                                                                                       |
|                         |             | Chlorthalidone 25 mg + furosemide 120-180 mg                                                                                                                                |                                                                                                      |                                                                                                             | Weight loss reduction of ≥1 kg: 26% (CI: 95% 10-41)                                                                                                                                                                               |                                                                                                                                                                                                                                                                                                                       |
| Kosiorek (2023) [23]    | 61          | Oral Acetazolamide 250mg + Lasix                                                                                                                                            | Diuresis<br>Fluid balance (ml)<br>Weight loss (kg)                                                   |                                                                                                             | Diuresis: 24, 48, 72 hours; 2750 ml, (P = 0.05), 5300 ml (P = 0.01), 7800 ml, (P = 0.004).<br>Fluid Balance: Day 1-3; –1682 ml (P = 0.015), –1232 ml (P = 0.042), –1126 ml (P =                                                   |                                                                                                                                                                                                                                                                                                                       |
|                         |             | Lasix (standard of care)                                                                                                                                                    |                                                                                                      |                                                                                                             | Diuresis: 24, 48, 72 hours; 1850 ml, 3750 ml, 5500 ml                                                                                                                                                                             |                                                                                                                                                                                                                                                                                                                       |
